# Supplementary material
Source: PubMed Central journal article supplement (PMC4344427)
Supplement: NIHMS643533-supplement-Supplemental_Figure_1.pdf [file NIHMS643533-supplement-Supplemental_Figure_1.pdf]

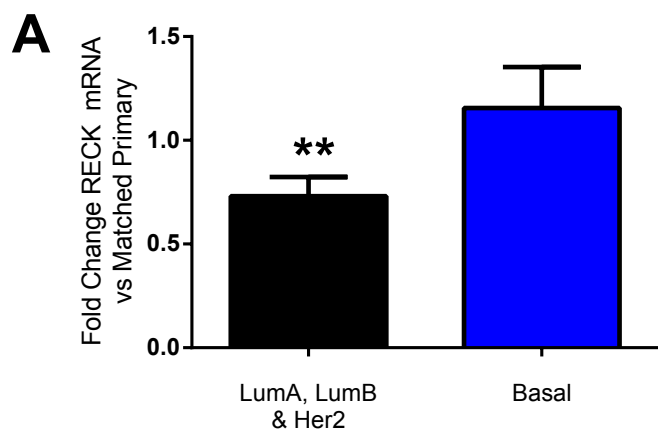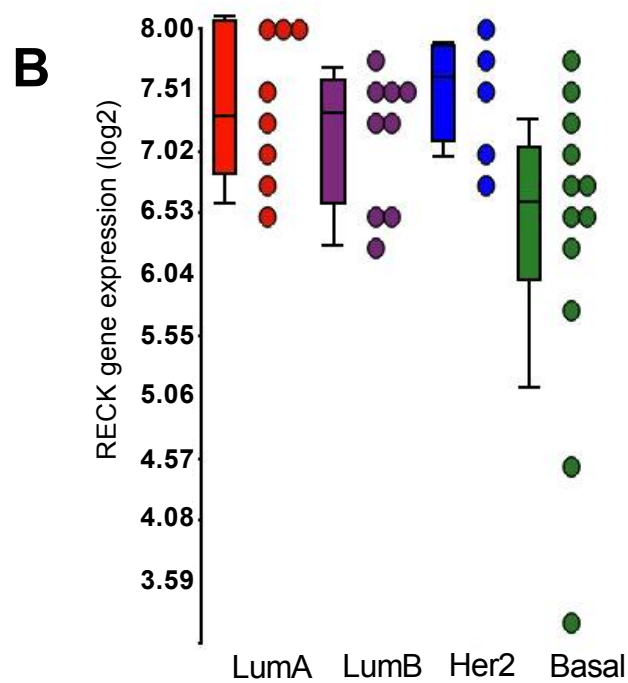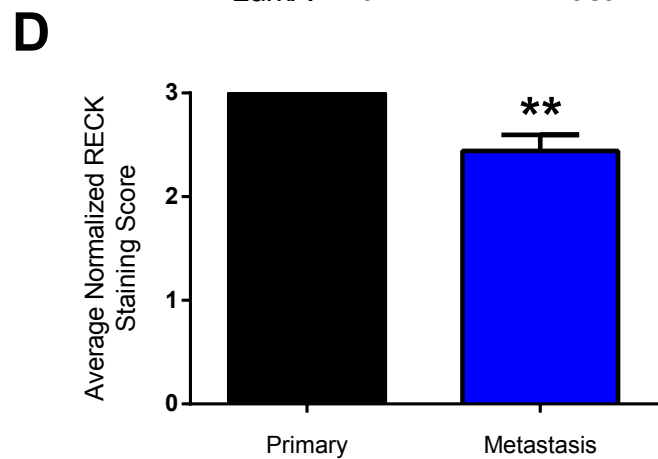

**C**

| Patient | Histological Staining Score (RECK) |            |
|---------|------------------------------------|------------|
|         | Primary Tumor                      | Metastasis |
| 1       | 1                                  | 1          |
| 2       | 2                                  | 2          |
| 3       | 2                                  | 0          |
| 4       | 0                                  | 0          |
| 5       | 3                                  | 3          |
| 6       | 3                                  | 1          |
| 7       | 1                                  | 1          |
| 8       | 2                                  | 2          |
| 9       | 0                                  | 0          |
| 10      | 3                                  | 1          |
| 11      | 3                                  | 3          |
| 12      | 2                                  | 0          |
| 13      | 0                                  | 0          |
| 14      | 2                                  | 0          |
| 15      | 2                                  | 2          |
| 16      | 0                                  | 0          |
| 17      | 3                                  | 3          |
| 18      | 2                                  | 2          |
| 19      | 0                                  | 0          |
| 20      | 3                                  | 0          |
| 21      | 0                                  | 0          |
| 22      | 0                                  | 0          |
| 23      | 3                                  | 0          |
| 24      | 3                                  | 3          |
| 25      | 2                                  | 2          |
| 26      | 1                                  | 1          |
| 27      | 2                                  | 2          |
| 28      | 3                                  | 3          |
| 29      | 2                                  | 2          |
| 30      | 3                                  | 3          |
| 31      | 3                                  | 1          |
| 32      | 1                                  | 1          |
| 33      | 2                                  | 0          |
| 34      | 2                                  | 2          |
| 35      | 3                                  | 3          |
| 36      | 3                                  | 2          |
| 37      | 2                                  | 2          |
| 38      | 1                                  | 1          |
| 39      | 0                                  | 0          |
| 40      | 3                                  | 0          |
| 41      | 0                                  | 0          |
| 42      | 0                                  | 0          |
| 43      | 3                                  | 3          |

Wilcoxon matched-pairs signed rank test  $p=0.0010$
