# Supplementary material
Source: PubMed Central journal article supplement (PMC4344427)
Supplement: NIHMS643533-supplement-Supplemental_Figure_4.pdf [file NIHMS643533-supplement-Supplemental_Figure_4.pdf]

**A**

| Gene Name   | Antibody     | Fold Change |
|-------------|--------------|-------------|
| STAT3       | Y705         | -2.66       |
| Smad2/3     | Pan-specific | -2.28       |
| p38a MAPK   | Pan-specific | -2.10       |
| Yes         | Pan-specific | -2.06       |
| PKCδ        | Y313         | -1.88       |
| CDK1 (CDC2) | Pan-specific | -1.74       |
| Grp75       | Pan-specific | -1.72       |
| PTP1B       | Pan-specific | -1.71       |
| Pax2        | S394         | -1.70       |
| FAK         | Y576         | -1.63       |
| Catenin b1  | Pan-specific | -1.60       |
| Huntingtin  | S421         | -1.55       |
| ZAP70       | Pan-specific | -1.50       |
| FRS2        | Y348         | -1.47       |

**B**

|                  |     |     |     |     |
|------------------|-----|-----|-----|-----|
| Scramble (nM)    | 400 | 200 | 200 | -   |
| RECK siRNA (nM)  | -   | 200 | -   | 200 |
| STAT3 siRNA (nM) | -   | -   | 200 | 200 |

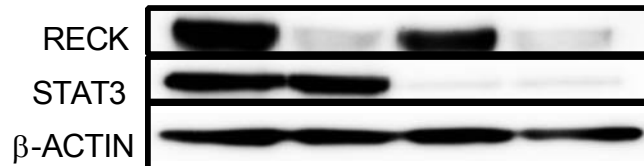**Supplementary Figure 4**
