# Supplementary material
Source: PubMed Central journal article supplement (PMC4344427)
Supplement: NIHMS643533-supplement-Supplemental_Figure_6.pdf [file NIHMS643533-supplement-Supplemental_Figure_6.pdf]

**A****Hs343T**

siSCR

siRECK

RECK

STAT3 Tyr705

STAT3 Ser727

STAT3

 $\beta$ -ACTIN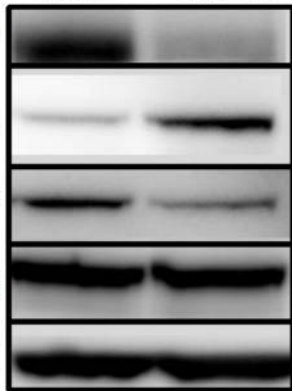**B****Hs606T**

siSCR

siRECK

RECK

STAT3 Tyr705

STAT3 Ser727

STAT3

 $\beta$ -ACTIN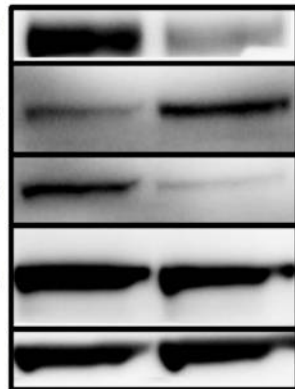**Supplementary Figure 6**
