# Supplementary material
Source: PubMed Central journal article supplement (PMC4344427)

**A**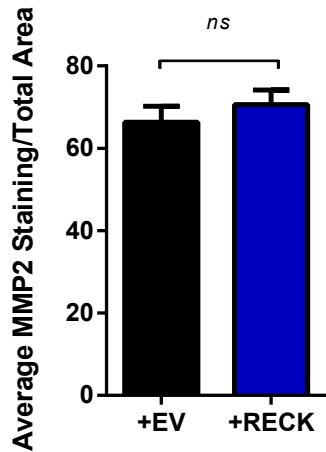**B**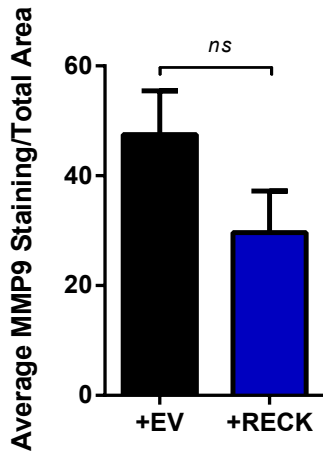**C**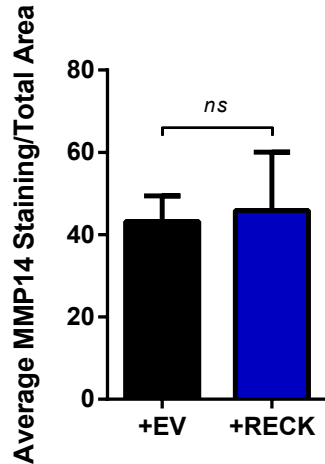**Supplementary Figure 2**

Supplement: NIHMS643533-supplement-Supplemental_Figure_2.pdf [file NIHMS643533-supplement-Supplemental_Figure_2.pdf]

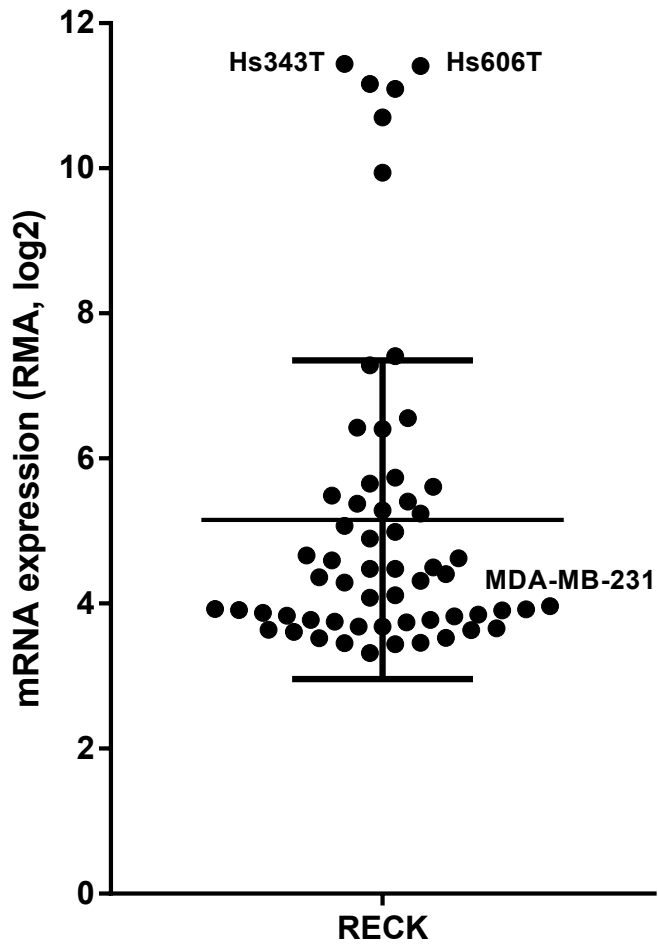

**Supplementary Figure 3**

Supplement: NIHMS643533-supplement-Supplemental_Figure_3.pdf [file NIHMS643533-supplement-Supplemental_Figure_3.pdf]

**A**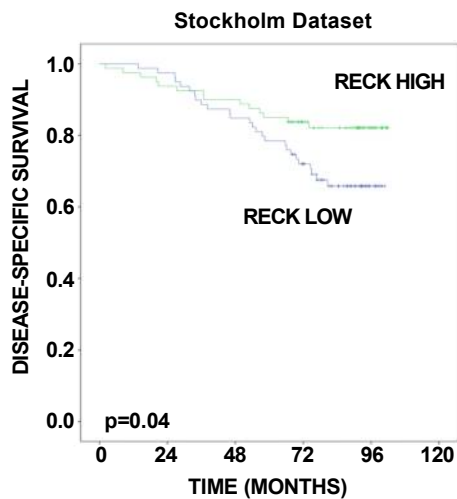**B**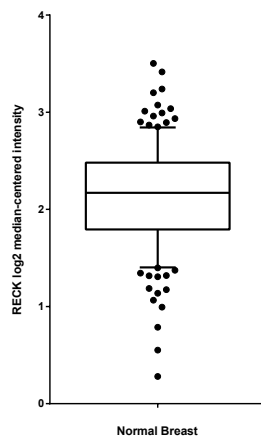**C**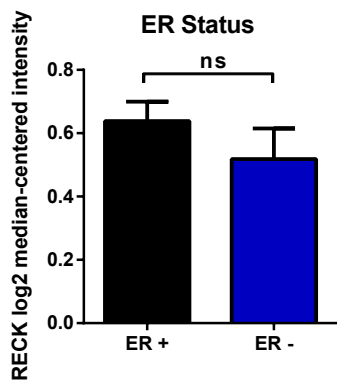**D**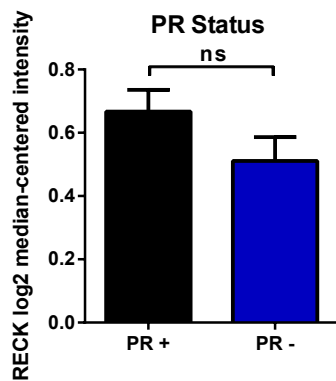**E**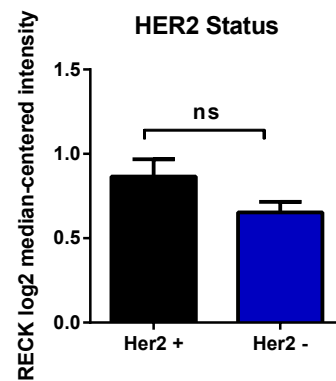**F**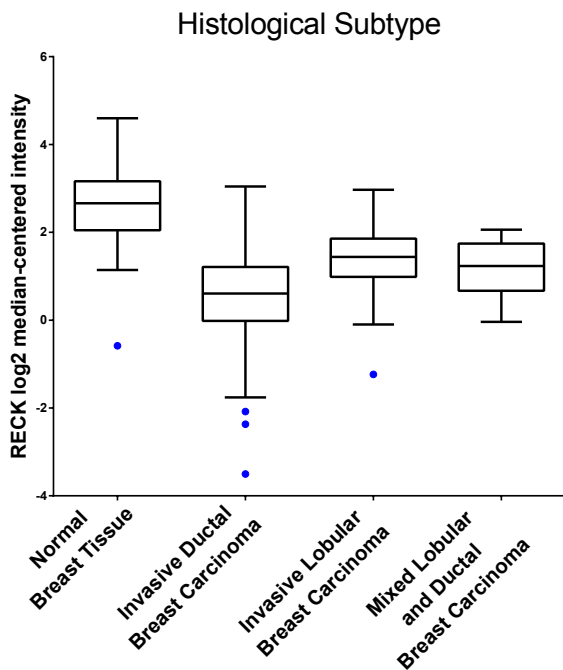**G**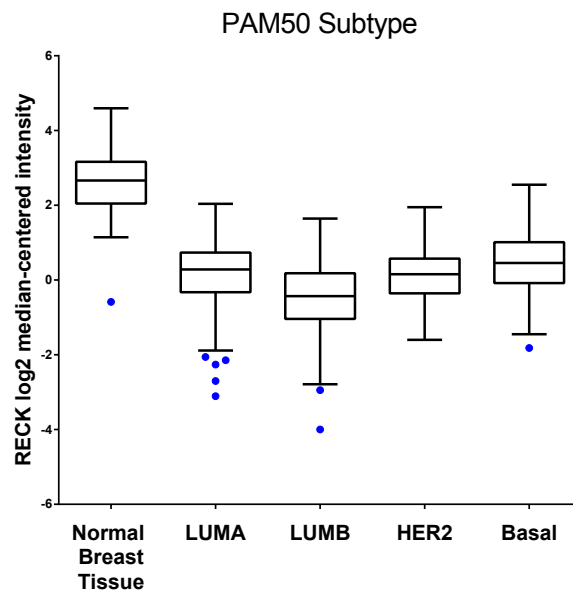

Supplement: NIHMS643533-supplement-Supplemental_Figure_5.pdf [file NIHMS643533-supplement-Supplemental_Figure_5.pdf]
